# Supplementary material for: Journeys, Journey Conditions, and Welfare Assessment of Broken (Handled) Horses on Arrival at Italian Slaughterhouses
Source: MDPI journal article supplement (doi:10.3390/ani12223122), 2022-11-12
Supplement: s1 [file s1]

**Table S1.** Checklist used during unloading to evaluate horses' welfare at arrival (reported in Zappaterra et al. [22], modified from Messori et al. [13]).

| UNLOADING PHASE: one copy for each journey                         |                                                          |
|--------------------------------------------------------------------|----------------------------------------------------------|
| Variable                                                           | Observations                                             |
| Arrival temperature and humidity                                   | -----                                                    |
| Date and time of arrival                                           | -----                                                    |
| Duration of unloading                                              | ----- minutes                                            |
| Total animals transported                                          | ----- N horses                                           |
| Dead on arrival (DOA)                                              | ----- N horses                                           |
| Non-ambulatory*                                                    | ----- N horses                                           |
| Reluctant to move/unload*                                          | ----- N horses                                           |
| Lame horses*                                                       | ----- N horses                                           |
| Slipping/Losing balance                                            | ----- N horses                                           |
| Falling                                                            | ----- N horses                                           |
| Galloping or jumping                                               | ----- N horses                                           |
| Body Condition Score                                               | Score 0-1: ___ N horses                                  |
|                                                                    | Score 5: ___ N horses                                    |
| Sweating                                                           | ----- N horses                                           |
| Injuries                                                           | ----- N horses                                           |
| Exhaustion                                                         | ----- N horses                                           |
| Coughing (more than one event)                                     | <input type="checkbox"/> Yes <input type="checkbox"/> No |
| The handler moves the animals in an arousing manner, inducing fear | <input type="checkbox"/> Yes <input type="checkbox"/> No |
| The handler moves the animals in a noisy manner, inducing fear     | <input type="checkbox"/> Yes <input type="checkbox"/> No |
| The handler hits the animals without reason                        | <input type="checkbox"/> Yes <input type="checkbox"/> No |
| The handler moves the animals properly**                           | <input type="checkbox"/> Yes <input type="checkbox"/> No |
| The handler performs prohibited practices**                        | <input type="checkbox"/> Yes <input type="checkbox"/> No |

\* mutually exclusive; \*\* mutually exclusive; "Non-ambulatory" = unable to independently assume and maintain a standing position; "Reluctant to move/unload" = unwillingness to move forward or move from its position; "Lame horses" = obvious attempt to take the weight off one or more limbs; "Losing balance" = slipping without the body hitting the ground; "Injuries" = damage to tissues, at the skin level or deeper.

**Table S2.** Checklist used within 30 minutes of the unloading of the last animal to evaluate the individual horses' welfare status at the lairage facilities (reported in Zappaterra et al. [22], modified from Messori et al. [13]).

|                                                                                                        |                      |                                                                           |                         |                  |
|--------------------------------------------------------------------------------------------------------|----------------------|---------------------------------------------------------------------------|-------------------------|------------------|
| INDIVIDUAL HORSE AFTER UNLOADING<br>(to be filled for each horse within 30 minutes<br>after unloading) | Date _____           | Hour _____                                                                | Venue _____             | Vehicle ID _____ |
|                                                                                                        | Horse ID _____       | Duration of travel _____                                                  | Country of origin _____ |                  |
|                                                                                                        | Sex                  | <input type="checkbox"/> Male <input type="checkbox"/> Female             |                         |                  |
|                                                                                                        | Halter               | <input type="checkbox"/> Yes <input type="checkbox"/> No                  |                         |                  |
|                                                                                                        | Age                  | -----                                                                     |                         |                  |
|                                                                                                        | Horse type           | <input type="checkbox"/> Draft-breed <input type="checkbox"/> Light-breed |                         |                  |
|                                                                                                        | Body Condition Score | -----                                                                     |                         |                  |
|                                                                                                        | Estimated weight     | -----                                                                     |                         |                  |
|                                                                                                        |                      | <input type="checkbox"/> Alert, responsive                                |                         |                  |
|                                                                                                        |                      | <input type="checkbox"/> Alert, quite                                     |                         |                  |
|                                                                                                        | Demeanor             | <input type="checkbox"/> Lethargic                                        |                         |                  |
|                                                                                                        |                      | <input type="checkbox"/> Depressed                                        |                         |                  |
|                                                                                                        |                      | <input type="checkbox"/> Exhausted                                        |                         |                  |
|                                                                                                        |                      | <input type="checkbox"/> Terrified                                        |                         |                  |
|                                                                                                        | Heart rate           | -----                                                                     |                         |                  |

|                         |                                                                                                                                                                   |
|-------------------------|-------------------------------------------------------------------------------------------------------------------------------------------------------------------|
| Respiratory rate        | -----                                                                                                                                                             |
| Coat                    | <input type="checkbox"/> Long <input type="checkbox"/> Short                                                                                                      |
| Sweating                | <input type="checkbox"/> Yes <input type="checkbox"/> No                                                                                                          |
| Feces                   | <input type="checkbox"/> Normal                                                                                                                                   |
| Clinical signs of colic | <input type="checkbox"/> Not formed                                                                                                                               |
|                         | <input type="checkbox"/> Diarrhoea                                                                                                                                |
|                         | <input type="checkbox"/> Yes <input type="checkbox"/> No                                                                                                          |
| Tail                    | <input type="checkbox"/> Normal                                                                                                                                   |
|                         | <input type="checkbox"/> Ruffled                                                                                                                                  |
|                         | <input type="checkbox"/> Visible skin                                                                                                                             |
|                         | <input type="checkbox"/> Split, with damaged skin                                                                                                                 |
|                         | <input type="checkbox"/> Bilateral                                                                                                                                |
| Nasal discharge         | <input type="checkbox"/> Unilateral                                                                                                                               |
|                         | <input type="checkbox"/> None                                                                                                                                     |
|                         | <input type="checkbox"/> Watery                                                                                                                                   |
| Type of nasal discharge | <input type="checkbox"/> Purulent                                                                                                                                 |
|                         | <input type="checkbox"/> Bloody mucus                                                                                                                             |
|                         | <input type="checkbox"/> Smelly                                                                                                                                   |
|                         | <input type="checkbox"/> Eyes                                                                                                                                     |
|                         | <input type="checkbox"/> Mouth                                                                                                                                    |
| Other discharges        | <input type="checkbox"/> Rectum                                                                                                                                   |
|                         | <input type="checkbox"/> Vulva or penis                                                                                                                           |
|                         | <input type="checkbox"/> None                                                                                                                                     |
| Cough                   | <input type="checkbox"/> Yes <input type="checkbox"/> No                                                                                                          |
|                         | <input type="checkbox"/> Yes <input type="checkbox"/> No                                                                                                          |
| Cuts or injuries        | How many-----                                                                                                                                                     |
|                         | Which-----                                                                                                                                                        |
| Lameness score          | <input type="checkbox"/> 0 <input type="checkbox"/> 1 <input type="checkbox"/> 2 <input type="checkbox"/> 3 <input type="checkbox"/> 4 <input type="checkbox"/> 5 |
| Other clinical signs    | <input type="checkbox"/> Yes----- <input type="checkbox"/> No                                                                                                     |
| Notes                   | -----                                                                                                                                                             |

**Table S3.** Checklist used **after unloading** to obtain information about the driver, vehicle and documentation (reported in Zappaterra et al., [22], modified from Messori et al. [13]).

|                  | Variable                                                               | Observations                                                                                     |
|------------------|------------------------------------------------------------------------|--------------------------------------------------------------------------------------------------|
| DRIVER           | Age                                                                    | -----                                                                                            |
|                  | Years of experience                                                    | -----                                                                                            |
|                  | Certificate of competence                                              | <input type="checkbox"/> Yes <input type="checkbox"/> No                                         |
| VEHICLE AND RAMP | Date_____ Hour_____ Venue_____ External temperature_____ Humidity_____ |                                                                                                  |
|                  | Vehicle ID_____ Vehicle origin_____                                    |                                                                                                  |
|                  | Vehicle covering                                                       | <input type="checkbox"/> Yes <input type="checkbox"/> No                                         |
|                  | Forced ventilation                                                     | <input type="checkbox"/> Yes (number)____ <input type="checkbox"/> No                            |
|                  | Cameras                                                                | <input type="checkbox"/> Yes (number)____ <input type="checkbox"/> No                            |
|                  | Horses in group:                                                       | <input type="checkbox"/> Yes Group number_____                                                   |
|                  |                                                                        | <input type="checkbox"/> No                                                                      |
|                  | If tied:                                                               | Rope length (cm) _____                                                                           |
|                  |                                                                        | <input type="checkbox"/> Appropriate                                                             |
|                  |                                                                        | <input type="checkbox"/> Inadequate                                                              |
|                  | Deck height                                                            | (cm) _____ <input type="checkbox"/> Appropriate <input type="checkbox"/> Inadequate              |
|                  | Ramp height                                                            | (cm) _____ <input type="checkbox"/> Appropriate <input type="checkbox"/> Inadequate              |
|                  | Direction of travel                                                    | <input type="checkbox"/> 90° (head left, right), <input type="checkbox"/> 45° (head left, right) |
|                  |                                                                        | <input type="checkbox"/> Forward, <input type="checkbox"/> Backwards                             |
|                  | Adjacent stalls*                                                       | <input type="checkbox"/> Yes <input type="checkbox"/> No                                         |
|                  | Ramp flooring type                                                     | -----                                                                                            |
|                  | Ramp flooring conditions                                               | <input type="checkbox"/> Appropriate <input type="checkbox"/> Inadequate                         |

|                                                          |                                                                                                                                                                                     |
|----------------------------------------------------------|-------------------------------------------------------------------------------------------------------------------------------------------------------------------------------------|
| Ramp covering                                            | <input type="checkbox"/> Bedding completely covering                                                                                                                                |
| Ramp lateral protections                                 | <input type="checkbox"/> Bedding partially covering <input type="checkbox"/> None                                                                                                   |
| Slots/Steps (> 10 cm between vehicle/ramp/floor/doors)   | <input type="checkbox"/> Yes, without openings or sharp edges                                                                                                                       |
| Ramp slope                                               | <input type="checkbox"/> Yes <input type="checkbox"/> No                                                                                                                            |
| Blockage zones (holes or physical obstacles) on the ramp | <input type="checkbox"/> Compliant <input type="checkbox"/> Not compliant                                                                                                           |
| Lighting for animal orientation                          | <input type="checkbox"/> Yes <input type="checkbox"/> No                                                                                                                            |
| Lighting for animal movement during unloading            | <input type="checkbox"/> Yes <input type="checkbox"/> No                                                                                                                            |
| Sharp edges                                              | <input type="checkbox"/> Yes <input type="checkbox"/> No                                                                                                                            |
| Number of partitions                                     | -----                                                                                                                                                                               |
| Dimensions of bays/compartments                          | Width-----Length-----                                                                                                                                                               |
| Dimensions of the vehicle (m <sup>2</sup> )              | -----                                                                                                                                                                               |
| Vehicle floor covering                                   | <input type="checkbox"/> Bedding completely covering                                                                                                                                |
| Drinkers                                                 | <input type="checkbox"/> Bedding partially covering <input type="checkbox"/> None                                                                                                   |
| Drinker type                                             | Total number-----Working number-----                                                                                                                                                |
| Water tank                                               | -----                                                                                                                                                                               |
| Temperature monitoring and control systems               | <input type="checkbox"/> Full <input type="checkbox"/> Partially Empty <input type="checkbox"/> Empty                                                                               |
| Signs of diarrhea in the vehicle                         | <input type="checkbox"/> Yes, working----- (°C)                                                                                                                                     |
| Documents/information checklist                          | <input type="checkbox"/> Yes, not working <input type="checkbox"/> None                                                                                                             |
|                                                          | <input type="checkbox"/> Yes <input type="checkbox"/> No                                                                                                                            |
|                                                          | <input type="checkbox"/> Passport, <input type="checkbox"/> CMR, <input type="checkbox"/> TRACES, <input type="checkbox"/> Journey Log, <input type="checkbox"/> Weight of the load |

\* Presence of horses in adjacent bays that cannot travel close together safely (mare/stallion or stallion/stallion).

**Table S4.** Checklist used 24 h after unloading to evaluate the individual horse welfare status at the lairage facilities (reported in Zappaterra et al. [22]).

| Date_____                                  | Hour_____                         | Venue_____             | Vehicle ID_____                    | Horse ID_____                                                     |
|--------------------------------------------|-----------------------------------|------------------------|------------------------------------|-------------------------------------------------------------------|
| Duration of travel_____                    |                                   | Country of origin_____ |                                    |                                                                   |
| INDIVIDUAL HORSE<br>(24 h after unloading) | Paddock/stabling box temperature  |                        |                                    | -----                                                             |
|                                            | Paddock/Stabling humidity         |                        |                                    | -----                                                             |
|                                            | Paddock/stabling exposure         |                        |                                    | <input type="checkbox"/> Sun <input type="checkbox"/> Shadow      |
|                                            | Number of horses per paddock/box  |                        |                                    | ----- horses                                                      |
|                                            |                                   |                        |                                    | <input type="checkbox"/> Clean                                    |
|                                            | Bedding cleaning                  |                        |                                    | <input type="checkbox"/> Partially clean                          |
|                                            |                                   |                        |                                    | <input type="checkbox"/> Dirty                                    |
|                                            | Freedom of movement               |                        |                                    | <input type="checkbox"/> Yes <input type="checkbox"/> No          |
|                                            | Sex                               |                        |                                    | <input type="checkbox"/> Male <input type="checkbox"/> Female     |
|                                            | Age                               |                        |                                    | -----                                                             |
|                                            | Horse type                        |                        |                                    | <input type="checkbox"/> Draft-breed                              |
|                                            |                                   |                        |                                    | <input type="checkbox"/> Light-breed                              |
|                                            | Declared level of animal handling |                        |                                    | <input type="checkbox"/> Broken <input type="checkbox"/> Unbroken |
|                                            |                                   |                        |                                    | <input type="checkbox"/> Alert, responsive                        |
|                                            |                                   |                        |                                    | <input type="checkbox"/> Alert, quite                             |
| Demeanor                                   |                                   |                        | <input type="checkbox"/> Lethargic |                                                                   |
|                                            |                                   |                        | <input type="checkbox"/> Depressed |                                                                   |
|                                            |                                   |                        | <input type="checkbox"/> Exhausted |                                                                   |
|                                            |                                   |                        | <input type="checkbox"/> Scared    |                                                                   |
| Heart rate                                 |                                   |                        | -----                              |                                                                   |
| Respiratory rate                           |                                   |                        | -----                              |                                                                   |

|                                   |                                                                                                                                                                   |
|-----------------------------------|-------------------------------------------------------------------------------------------------------------------------------------------------------------------|
|                                   | <input type="checkbox"/> Normal                                                                                                                                   |
| Feces                             | <input type="checkbox"/> Not formed                                                                                                                               |
|                                   | <input type="checkbox"/> Diarrhea                                                                                                                                 |
| Clinical signs of colic           | <input type="checkbox"/> Yes <input type="checkbox"/> No                                                                                                          |
|                                   | <input type="checkbox"/> Bilateral                                                                                                                                |
| Nasal discharge                   | <input type="checkbox"/> Unilateral                                                                                                                               |
|                                   | <input type="checkbox"/> None                                                                                                                                     |
|                                   | <input type="checkbox"/> Watery                                                                                                                                   |
| Type of nasal discharge           | <input type="checkbox"/> Purulent                                                                                                                                 |
|                                   | <input type="checkbox"/> Bloody mucus                                                                                                                             |
|                                   | <input type="checkbox"/> Smelly                                                                                                                                   |
|                                   | <input type="checkbox"/> Eyes <input type="checkbox"/> Mouth                                                                                                      |
| Other discharges                  | <input type="checkbox"/> Rectum <input type="checkbox"/> Vulva or penis <input type="checkbox"/> None                                                             |
|                                   | <input type="checkbox"/> Yes <input type="checkbox"/> No                                                                                                          |
| Cough                             | <input type="checkbox"/> Yes <input type="checkbox"/> No                                                                                                          |
| Cuts or injuries (including tail) | How many_ _ _ _ _                                                                                                                                                 |
|                                   | Which_ _ _ _ _                                                                                                                                                    |
| Lameness score                    | <input type="checkbox"/> 0 <input type="checkbox"/> 1 <input type="checkbox"/> 2 <input type="checkbox"/> 3 <input type="checkbox"/> 4 <input type="checkbox"/> 5 |
| Other clinical signs              | <input type="checkbox"/> Yes_ _ _ _ _ <input type="checkbox"/> No                                                                                                 |
| Broken/unbroken test (BUT)        | Approaching and haltering <input type="checkbox"/> 0 <input type="checkbox"/> 1 <input type="checkbox"/> 2                                                        |
|                                   | Handling <input type="checkbox"/> 0 <input type="checkbox"/> 1 <input type="checkbox"/> 2                                                                         |
| Notes                             | _ _ _ _ _                                                                                                                                                         |

**Table S5.** Meaning and types of variables collected and statistically analysed in the present study (Table 5 of Zappaterra et al. [22]).

| Variables                        | Explanation                                                                                                                                                   | Types of variables                                               |
|----------------------------------|---------------------------------------------------------------------------------------------------------------------------------------------------------------|------------------------------------------------------------------|
| <b>Journey-related variables</b> |                                                                                                                                                               |                                                                  |
| Country of origin                | Country of birth of the horse (i.e., France; Poland; Slovenia, Czech Republic; Croatia; UK; Ireland; Holland; Germany)                                        | Categorical (3 classes: France; Poland; Others)                  |
| Departure country                | Country of departure of each journey (i.e., France; Poland; Slovenia; Hungary)                                                                                | Categorical (3 classes: France; Poland; Other Eastern countries) |
| Duration from TRACES (h)         | Journey duration from departure to arrival (from TRACES)                                                                                                      | Continuous                                                       |
| Duration from Journey log (h)    | Journey duration from departure to arrival (from Journey Log)                                                                                                 | Continuous                                                       |
| Hours in transit (h)             | Number of hours spent by the horses on the vehicle in motion (stops excluded)                                                                                 | Continuous                                                       |
| Number of short stops (<12 h)    | Number of short stops (< 12 h) during transport                                                                                                               | Categorical                                                      |
| Classes of short stops (<12 h)   | Number of short stops (<12 h) during the journey without horses unloading categorized into two classes (between 0 and 2 short stops; more than 2 short stops) | Dichotomous                                                      |
| Long stops (>12 h)               | Presence/absence of a stop during the journey with the horses unloaded from the vehicle, for feeding and watering (>12 h)                                     | Dichotomous                                                      |

|                                                                    |                                                                                                                                                     |             |
|--------------------------------------------------------------------|-----------------------------------------------------------------------------------------------------------------------------------------------------|-------------|
| Vehicle change                                                     | If horses were unloaded from one vehicle and loaded onto a different vehicle to continue the journey                                                | Dichotomous |
| Stocking density (kg/m <sup>2</sup> )                              | How many kg of live weight was distributed per m <sup>2</sup>                                                                                       | Continuous  |
| Horses per vehicle (n)                                             | Number of horses on the vehicles                                                                                                                    | Continuous  |
| Space allowance (m <sup>2</sup> /animal)                           | m <sup>2</sup> available for each horse, net of partitions                                                                                          | Continuous  |
| Space allowance classes                                            | m <sup>2</sup> available for each horse, net of partitions, divided into classes (i.e., <1.75 m <sup>2</sup> /animal, >1.75 m <sup>2</sup> /animal) | Dichotomous |
| Load weight from CMR (kg)                                          | Total weight of horses on a vehicle (from CMR)                                                                                                      | Continuous  |
| Load weight from TRACES (kg)                                       | Total weight of horses on a vehicle (from TRACES)                                                                                                   | Continuous  |
| Animal in group (n)                                                | Total number of horses in group                                                                                                                     | Continuous  |
| Group size (n)                                                     | Number of horses per group (i.e., 2, 3 or 4)                                                                                                        | Categorical |
| Tied                                                               | If the horses were tied in transit                                                                                                                  | Dichotomous |
| Direction of travel                                                | The direction in which the horse travelled (i.e., 90° head right, 90° head left, free, oblique, forward, backward)                                  | Categorical |
| Season                                                             | Seasons in which horses travelled (i.e., Spring, Summer, Autumn, Winter)                                                                            | Categorical |
| Arrival temperature (°C)                                           | External environmental temperature measured through a weather station                                                                               | Continuous  |
| Fed during transport                                               | Presence/absence of the feeding of horses during the journey                                                                                        | Dichotomous |
| Unloading duration (min)                                           | From the lowering of the vehicle ramp until the last horse was unloaded measured with a stopwatch                                                   | Continuous  |
| <b>Human-related variables</b>                                     |                                                                                                                                                     |             |
| Driver's age (years)                                               | Age of the vehicle driver                                                                                                                           | Continuous  |
| Driver's experience (years)                                        | Years of experience driving vehicles for the transport of horses                                                                                    | Continuous  |
| Certificate of competence                                          | Presence/absence of the certificate of competence                                                                                                   | Dichotomous |
| The handler moves the animals in an arousing manner, inducing fear | The handler induces the horse/s to move with rapid movement of the body (i.e., arms or running, inducing fear)                                      | Dichotomous |
| The handler moves the animals in a noisy manner, inducing fear     | The handler induces the horse/s to move with loud sounds (i.e., shouting or by slamming, inducing fear)                                             | Dichotomous |
| The handler hits the animals without reason                        | The handler hits the horse/s while it/there is/are moving or even if it/there is/are not able to move                                               | Dichotomous |
| The handler moves the animals properly                             | The handler moves the horse/s without endangering the safety of the animal/s or their own                                                           | Dichotomous |
| The handler performs prohibited practices                          | The handler performs practices which are banned in Regulation EC 1/2005                                                                             | Dichotomous |
| Beaten with a stick                                                | The horse was beaten with a stick or rubber tube at unloading                                                                                       | Dichotomous |
| <b>Vehicle-related variables</b>                                   |                                                                                                                                                     |             |
| Total vehicle dimension (m <sup>2</sup> )                          | Internal dimensions of the vehicles                                                                                                                 | Continuous  |

|                                             |                                                                                                                      |             |
|---------------------------------------------|----------------------------------------------------------------------------------------------------------------------|-------------|
| Ramp height                                 | Height from the highest point of the ramp to the ground                                                              | Continuous  |
| Ramp slope                                  | Compliance/non-compliance of the ramp slope with Regulation 1/2005                                                   | Dichotomous |
| Ramp flooring                               | Cover material for the unloading ramp (i.e., Non-slip knurled metal with foot battens; Corrugated metal; Rubber mat) | Categorical |
| Ramp side gates                             | Presence/absence of side gates on the ramp                                                                           | Dichotomous |
| Ramp covering                               | Degree of coverage of the ramp with bedding material (i.e., None, Partial, Complete)                                 | Dichotomous |
| Deck height                                 | Height from the highest point of the ramp to the ground                                                              | Continuous  |
| Vehicle floor bedding                       | Degree of coverage of the vehicle floor with bedding material (i.e., Partial, Complete)                              | Dichotomous |
| Vehicle bedding type                        | Bedding material for the vehicle floor (i.e., Straw, Shavings, Straw and shavings, Sand and shavings)                | Categorical |
| Individual bays (n)                         | Number of bays housing one horse                                                                                     | Continuous  |
| Individual bays dimension (m <sup>2</sup> ) | The width and the length of the individual bays                                                                      | Continuous  |
| Adjacent stalls                             | Presence of horses that cannot travel close together safely (mare/stallion or stallion/stallion)                     | Dichotomous |
| Drinkers (n)                                | Number of drinkers vs working drinkers on the vehicles                                                               | Continuous  |
| Type of drinkers                            | Structure and characteristics of the drinkers (i.e., Portable, Fixed Bowls)                                          | Dichotomous |
| Water tank                                  | The filling level of the water tank (i.e., Partially Empty, Empty)                                                   | Dichotomous |
| Temperature monitoring system               | Presence/absence of vehicle interior temperature monitoring system                                                   | Dichotomous |
| Cameras                                     | Presence/absence of vehicle interior cameras                                                                         | Dichotomous |
| Forced ventilation                          | Presence/absence of vehicle interior forced ventilation system                                                       | Dichotomous |
| Number of forced ventilators                | Number of forced ventilators on the vehicles                                                                         | Continuous  |
| Lighting system for animals' orientation    | Presence/absence of vehicle interior lighting system                                                                 | Dichotomous |
| Lighting system for loading/unloading       | Presence/absence of vehicle external lighting system                                                                 | Dichotomous |
| Slot/steps                                  | Presence/absence of empty space (>10 cm) between the vehicle's structures (vehicle/ramp /floor/doors)                | Dichotomous |
| Blockage zone on the ramp                   | Presence/absence of holes or physical obstacles on the ramp which block the movements of the horses                  | Dichotomous |
| Sharp edges                                 | Presence/absence of potentially dangerous sharp edges on vehicle structures                                          | Dichotomous |
| Signs of diarrhoea in the vehicle           | Presence/absence of signs of diarrhoea inside the vehicle                                                            | Dichotomous |
| <b>Horse-related variables</b>              |                                                                                                                      |             |
| Horse ID                                    | Horse identification based on passport's microchip number                                                            | Categorical |
| Horse's Age                                 | Age of the individual horse                                                                                          | Continuous  |
| Horse's Type                                | Categorization of morphology (i.e., light-breed horse, draft-breed horse)                                            | Dichotomous |

|                                    |                                                                                                                                                   |                          |
|------------------------------------|---------------------------------------------------------------------------------------------------------------------------------------------------|--------------------------|
| Horse's age*Horse's type           | Interaction between horse's age (continuous) and horse's type (dichotomous)                                                                       | Continuous               |
| Halter                             | Presence/absence of the halter on the horse                                                                                                       | Dichotomous              |
| Dead on arrival                    | Number of dead horses per journey                                                                                                                 | Continuous               |
| Non-ambulatory                     | Number of horses unable to independently assume and maintain a standing position per journey                                                      | Continuous               |
| Lame horses                        | Number of horses which perform clear attempts to take the weight off one or more limbs per journey                                                | Continuous               |
| Injuries                           | Number of horses with injuries involving superficial or deeper tissues on the horse's body and potentially causing a loss of function per journey | Continuous               |
| Injuries                           | Presence/absence of injuries (cuts and/or bruises on the animal's body)                                                                           | Dichotomous              |
| Injured tail                       | Presence/absence of injuries on the tail                                                                                                          | Dichotomous              |
| Injured head/neck                  | Presence/absence of injuries on the head and/or neck                                                                                              | Dichotomous              |
| Lameness score                     | Scoring of the lameness severity from 0 to 5                                                                                                      | Categorical              |
| Clinical signs of colic            | Horses showing signs of abdominal pain/discomfort                                                                                                 | Dichotomous              |
| Nasal discharge                    | Presence/absence of loss of material from the nose                                                                                                | Categorical              |
| Type of nasal discharge            | Which characteristics the nasal discharge has (i.e., color, consistency, smell)                                                                   | Categorical              |
| Lacrimal discharge                 | Presence/absence of loss of material from the eyes                                                                                                | Dichotomous              |
| Other discharges                   | Presence/absence of loss of material from other orifices (i.e., penis, vagina etc...)                                                             | Categorical              |
| Coughing                           | Presence/absence of horses'/'s cough attacks per journey or per single animal                                                                     | Dichotomous              |
| Heart Rate                         | Number of heartbeats in one minute                                                                                                                | Continuous               |
| Respiratory Rate                   | Number of respiratory acts in one minute                                                                                                          | Continuous               |
| Feces                              | Presence/absence of feces with an altered consistency                                                                                             | Dichotomous              |
| Clinical signs of colic            | Presence/absence of any sign of abdominal discomfort                                                                                              | Dichotomous              |
| Other clinical signs               | Presence/absence of any sign suggesting a loss of function in one of the main body systems                                                        | Dichotomous              |
| Sweating                           | Number of horses showing signs of sweating on the bodies per journey/ Presence/absence of sweating signs on horse body                            | Continuous / Dichotomous |
| Coat                               | Presence of winter (long) or summer (short) hair on the animal                                                                                    | Dichotomous              |
| Horse's Body Condition Score (BCS) | Number of horses per vehicle that present 0–1 or 5 score BCS                                                                                      | Continuous               |
| Estimate weight                    | Estimated horse's weight based on assessors' evaluation                                                                                           | Continuous               |
| Reluctance to move/unload          | The horse showed unwillingness to move forward or move from its position during unloading per journey                                             | Continuous               |
| Slipping/Losing of balance         | Number of horses showing uncontrolled limb movement due to slippery ground during unloading per journey                                           | Continuous               |
| Falling                            | Number of horses showing loss of balance with body touching the ground during unloading per journey                                               | Continuous               |

|                                   |                                                                                                                                          |             |
|-----------------------------------|------------------------------------------------------------------------------------------------------------------------------------------|-------------|
| Galloping and/or jumping          | Number of horses galloping and/or jumping during unloading per journey                                                                   | Continuous  |
| Demeanour                         | State of the sensorium and reactivity to external stimuli (i.e., Alert/responsive, Alert/quiet, Lethargic, Depressed, Exhausted, Scared) | Categorical |
| <b>Lairage-related variables</b>  |                                                                                                                                          |             |
| Temperature                       | External environmental temperature measured through a weather station                                                                    | Continuous  |
| Relative humidity                 | External environmental relative humidity measured through a weather station                                                              | Continuous  |
| Exposure                          | The exposure of the paddock/stabling to sun or shadow                                                                                    | Dichotomous |
| Bedding cleaning                  | The level of cleanliness of the bedding                                                                                                  | Categorical |
| Number of horses per facility     | Number of horses in stabling boxes (i.e., 1, 2, 3) or paddocks (i.e., 4-11, more frequently 6-7)                                         | Categorical |
| Freedom of movement               | Presence/absence of freedom of movement for the horse                                                                                    | Dichotomous |
| Declared level of animal handling | Declared level of taming at departure                                                                                                    | Dichotomous |
| Broken/unbroken test (BUT)        | Score 0-2 (x2) to the two phases (haltering and handling) of BUT                                                                         | Categorical |

**Table S6.** Associations between the predictive variables and the presence/absence of reluctance to move behavior at unloading in the 613 broken horses transported to two slaughterhouses in Italy. Associations are presented with Wald Test P-values.

| Variable                              | Wald test P-value |
|---------------------------------------|-------------------|
| Duration from Journey Log             | <0.001            |
| Unloading duration                    | <0.001            |
| Driver's experience                   | 0.500             |
| Arrival temperature                   | 0.532             |
| Season                                | <0.001            |
| Vehicle change                        | 0.013             |
| Long stops (>12h)                     | <0.001            |
| Number of short stops classes         | 0.010             |
| Fed during transport                  | 0.101             |
| Tied                                  | <0.001            |
| Ramp flooring                         | <0.001            |
| Ramp side gates                       | 0.764             |
| Ramp lateral protections              | 0.118             |
| Stocking density                      | 0.008             |
| The handler moves properly the horses | <0.001            |
| Vehicle bedding type                  | <0.001            |
| Type of drinkers                      | 0.003             |
| Horse's sex                           | 0.485             |
| Horse's age                           | 0.005             |
| Horse's BCS                           | 0.111             |
| Horse's type                          | 0.018             |
| Coat                                  | 0.313             |
| Use of the stick                      | <0.001            |



**Table S7.** Associations between the predictive variables and the presence/absence of nasal discharge in the 613 broken horses transported to two slaughterhouses in Italy. Associations are presented with Wald Test P-values.

| Variable                              | Wald test P-value |
|---------------------------------------|-------------------|
| Duration from Journey Log             | <0.001            |
| Unloading duration                    | <0.001            |
| Driver's experience                   | 0.368             |
| Arrival temperature                   | <0.001            |
| Season                                | <0.001            |
| Vehicle change                        | <0.001            |
| Long stops (>12h)                     | 0.984             |
| Number of short stops classes         | <0.001            |
| Fed during transport                  | <0.001            |
| Tied                                  | <0.001            |
| Ramp flooring                         | 0.978             |
| Ramp side gates                       | 0.565             |
| Ramp lateral protections              | <0.001            |
| Stocking density                      | <0.001            |
| The handler moves properly the horses | 0.983             |
| Vehicle bedding type                  | <0.001            |
| Type of drinkers                      | <0.001            |
| Horse's sex                           | 0.083             |
| Horse's age                           | <0.001            |
| Horse's BCS                           | <0.001            |
| Horse's type                          | <0.001            |
| Coat                                  | 0.014             |

**Table S8.** Associations between the predictive variables and the presence/absence of lacrimal discharge in the 613 broken horses transported to two slaughterhouses in Italy. Associations are presented with Wald Test p-values.

| Variable                              | Wald test p-value |
|---------------------------------------|-------------------|
| Duration from Journey Log             | <0.001            |
| Unloading duration                    | <0.001            |
| Driver's experience                   | 0.448             |
| Arrival temperature                   | <0.001            |
| Season                                | 0.002             |
| Vehicle change                        | <0.001            |
| Long stops (>12h)                     | 0.984             |
| Number of short stops classes         | <0.001            |
| Fed during transport                  | <0.001            |
| Tied                                  | <0.001            |
| Ramp flooring                         | 0.287             |
| Ramp side gates                       | 0.986             |
| Ramp lateral protections              | <0.001            |
| Stocking density                      | <0.001            |
| The handler moves properly the horses | 0.984             |
| Vehicle bedding type                  | <0.001            |
| Type of drinkers                      | <0.001            |
| Horse's sex                           | <0.001            |
| Horse's age                           | 0.001             |
| Horse's BCS                           | <0.001            |
| Horse's type                          | <0.001            |
| Coat                                  | 0.010             |
| Nasal discharge                       | <0.001            |

**Table S9.** Associations between the predictive variables and the presence/absence of injuries and cuts in the 613 broken horses transported to two slaughterhouses in Italy. Associations are presented with Wald Test p-values.

| Variable                              | Wald test p-value |
|---------------------------------------|-------------------|
| Duration from Journey Log             | <0.001            |
| Unloading duration                    | <0.001            |
| Driver's experience                   | 0.106             |
| Arrival temperature                   | 0.027             |
| Season                                | <0.001            |
| Vehicle change                        | <0.001            |
| Long stops (>12h)                     | <0.001            |
| Number of short stops classes         | <0.001            |
| Fed during transport                  | 0.009             |
| Tied                                  | <0.001            |
| Ramp flooring                         | <0.001            |
| Ramp side gates                       | 0.478             |
| Ramp lateral protections              | 0.228             |
| Stocking density                      | <0.001            |
| The handler moves properly the horses | <0.001            |
| Vehicle bedding type                  | <0.001            |
| Type of drinkers                      | 0.036             |
| Horse's sex                           | 0.958             |
| Horse's age                           | 0.038             |
| Horse's BCS                           | <0.001            |
| Horse's type                          | <0.001            |
| Coat                                  | 0.537             |

**Table S10.** Associations between the predictive variables and the presence/absence of injured tails in the 613 broken horses transported to two slaughterhouses in Italy. Associations are presented with Wald Test p-values.

| Variable                                  | Wald test p-value |
|-------------------------------------------|-------------------|
| Departure country                         | 0.022             |
| Duration from Journey Log                 | 0.011             |
| Unloading duration                        | 0.006             |
| Driver's experience                       | 0.468             |
| Arrival temperature                       | 0.723             |
| Season                                    | 0.366             |
| Vehicle change                            | 0.066             |
| Long stops (>12h)                         | 0.062             |
| Number of short stops classes             | 0.054             |
| Fed during transport                      | 0.899             |
| Tied                                      | 0.010             |
| Ramp flooring                             | 0.104             |
| Ramp side gates                           | <0.001            |
| Ramp lateral protections                  | 0.988             |
| Stocking density                          | 0.005             |
| The handler performs prohibited practices | 0.068             |
| Vehicle bedding type                      | <0.001            |
| Type of drinkers                          | 0.401             |
| Horse's sex                               | 0.313             |
| Horse's age                               | 0.005             |
| Horse's BCS                               | 0.002             |
| Horse's type                              | 0.224             |

|                     |       |
|---------------------|-------|
| Coat                | 0.508 |
| Sweating            | 0.413 |
| Beaten with a stick | 0.586 |

**Table S11.** Associations between the predictive variables and the presence/absence of injured head/neck in the 613 broken horses transported to two slaughterhouses in Italy. Associations are presented with Wald Test p-values.

| Variable                                  | Wald test p-value |
|-------------------------------------------|-------------------|
| Departure country                         | <0.001            |
| Duration from Journey Log                 | <0.001            |
| Hours in transit                          | <0.001            |
| Unloading duration                        | <0.001            |
| Driver's experience                       | 0.608             |
| Arrival temperature                       | 0.066             |
| Season                                    | <0.001            |
| Vehicle change                            | 0.003             |
| Long stops (>12h)                         | <0.001            |
| Number of short stops classes             | 0.003             |
| Fed during transport                      | 0.002             |
| Tied                                      | <0.001            |
| Ramp flooring                             | <0.001            |
| Ramp side gates                           | 0.203             |
| Ramp lateral protections                  | 0.576             |
| Stocking density                          | <0.001            |
| The handler performs prohibited practices | <0.001            |
| Vehicle bedding type                      | <0.001            |
| Type of drinkers                          | 0.014             |
| Horse's sex                               | 0.971             |
| Horse's age                               | 0.007             |
| Horse's BCS                               | 0.002             |
| Horse's type                              | 0.001             |
| Coat                                      | 0.824             |
| Sweating                                  | 0.413             |
| Beaten with a stick                       | 0.395             |
